# Supplementary material for: CaLuGaO 4 :Bi 3+ ,Al 3+ blue phosphor with excellent thermal stability for multiple LED applications
Source: Royal Society of Chemistry journal article supplement (doi:10.1039/d4tc05004e), 2025-01-01
Supplement: d4tc05004e1.pdf [file d4tc05004e1.pdf]

**Supplementary information**

**CaLuGaO<sub>4</sub>: Bi<sup>3+</sup>, Al<sup>3+</sup> blue phosphor with excellent thermal stability for multiple LED applications**

Zhicheng Liao<sup>a</sup>, Qian Zhang<sup>b</sup>, Liting Qiu<sup>c</sup>, Xiantao Wei<sup>d</sup>, Yonghu Chen<sup>\*b</sup>, Min Yin<sup>\*b</sup>

<sup>a</sup> CAS Key Laboratory of Microscale Magnetic Resonance, and School of Physical Sciences, University of Science and Technology of China, Hefei 230026, China

<sup>b</sup> Key Laboratory of Strongly-Coupled Quantum Matter Physics, Chinese Academy of Sciences, School of Physical Sciences, University of Science and Technology of China, Hefei 230026, PR China

<sup>c</sup> School of Mechanical, Electronic & Information Engineering, Putian University, Putian 351100, P. R. China

<sup>d</sup> Physics Experiment Teaching Center, School of Physical Sciences, University of Science and Technology of China, Hefei 230026, PR China

**\* Corresponding authors.**

E-mail addresses: yhuchen@ustc.edu.cn (Y. Chen), yinmin@ustc.edu.cn (M. Yin)

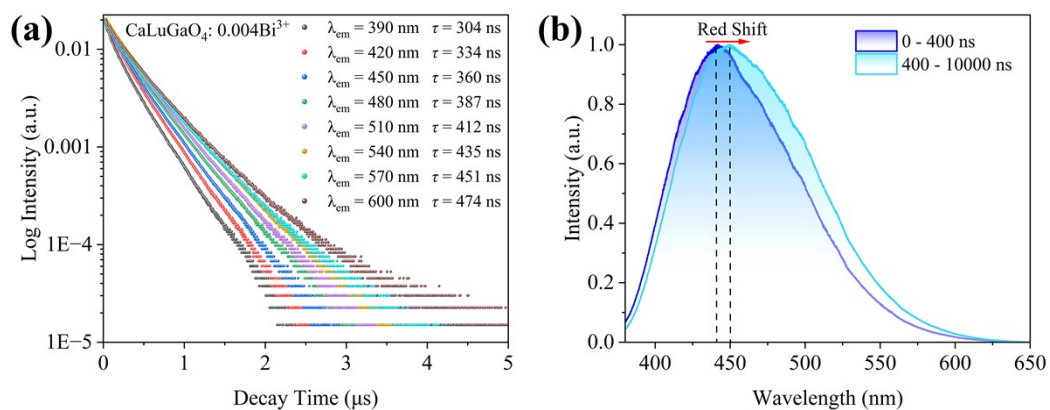

Fig. S1 (a) Room temperature fluorescence decay curves of CaLuGaO<sub>4</sub>: 0.004Bi<sup>3+</sup> with the monitoring wavelength ranging from 390 nm to 600 nm. (b) PL spectra of CaLuGaO<sub>4</sub>: 0.004Bi<sup>3+</sup> within two separate time windows, 0 – 400 ns and 400 – 10000 ns, after the termination of 355 nm excitation.

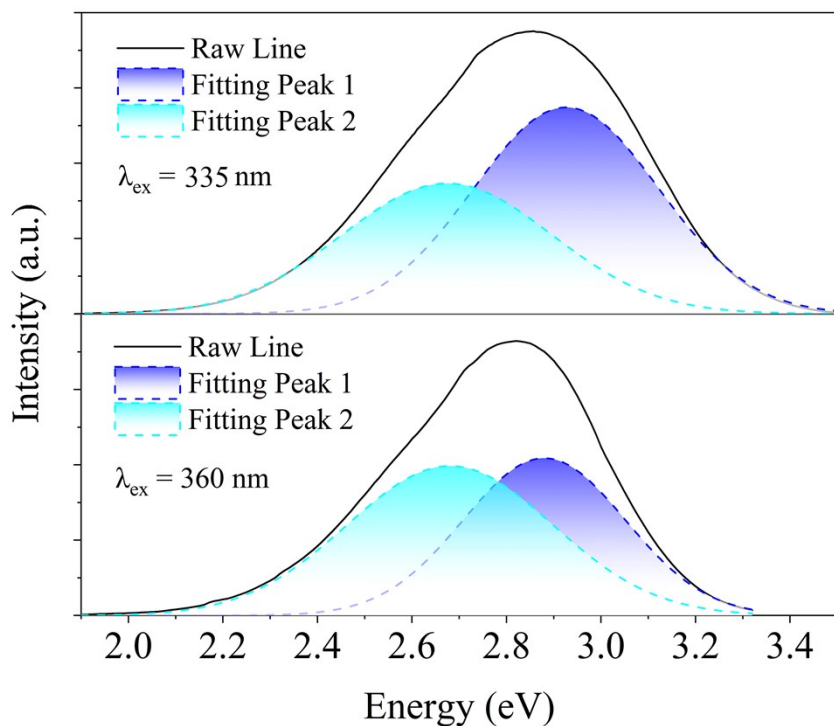

Fig. S2 The Gaussian fitting of the PL spectra of CaLuGaO<sub>4</sub>: Bi<sup>3+</sup> excited at 335 nm and 360 nm.

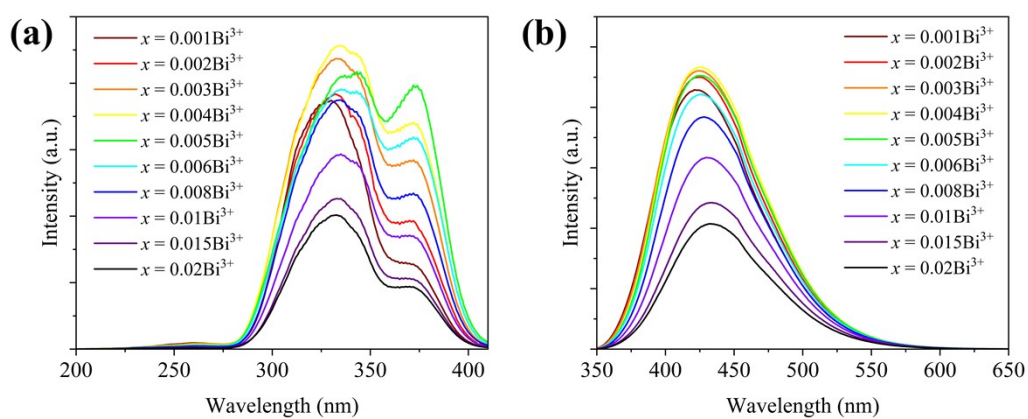

Fig. S3 (a) PLE spectra of  $\text{CaLuGaO}_4: x\text{Bi}^{3+}$  under 430 nm monitoring wavelength. (b) PL spectra of  $\text{CaLuGaO}_4: x\text{Bi}^{3+}$  under 335 nm excitation wavelength.

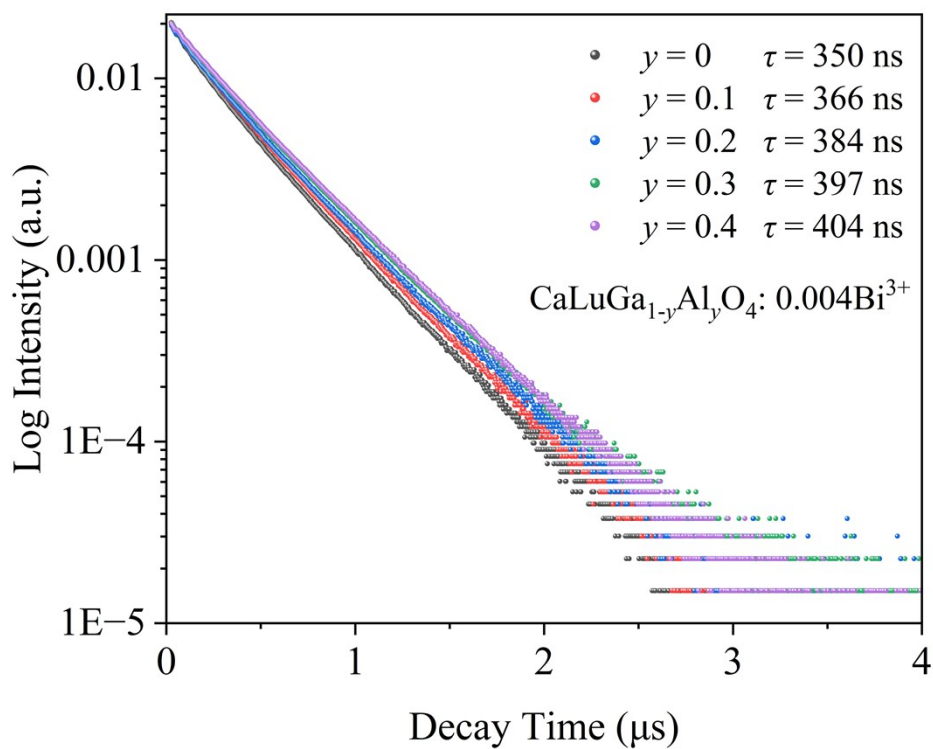

Fig. S4 Room temperature fluorescence decay curves of  $\text{CaLuGa}_{1-y}\text{Al}_y\text{O}_4: 0.004\text{Bi}^{3+}$  ( $y = 0 - 0.4$ ) monitored at 430 nm.

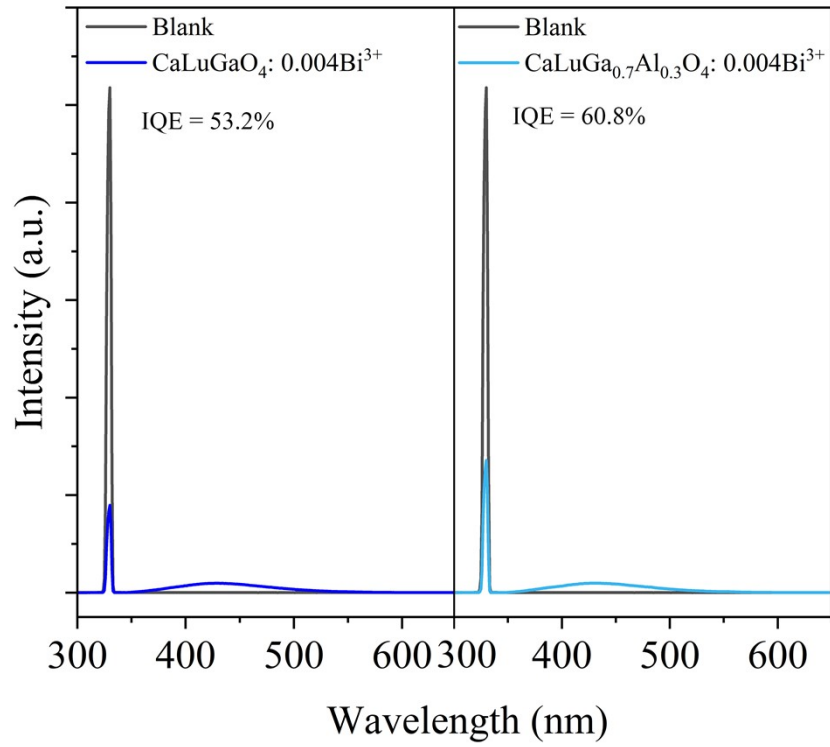

Fig. S5 IQE-based PL spectra of  $\text{CaLuGaO}_4: 0.004\text{Bi}^{3+}$  and  $\text{CaLuGa}_{0.7}\text{Al}_{0.3}\text{O}_4: 0.004\text{Bi}^{3+}$ .

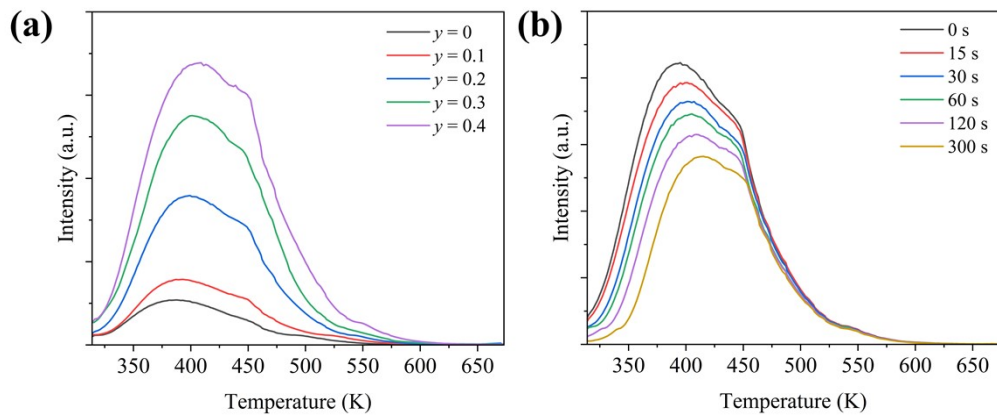

Fig. S6(a) Thermoluminescence curves of  $\text{CaLuGaO}_4: 0.004\text{Bi}^{3+}, y\text{Al}^{3+}$  in the temperature of 313 – 673 K, (b) Thermoluminescence curves of  $\text{CaLuGaO}_4: 0.004\text{Bi}^{3+}, 0.3\text{Al}^{3+}$  at various time intervals following the cessation of excitation light.

Table S1 Bond length data of  $\text{CaLuGaO}_4$  obtained from Rietveld refinement

| Atom 1 | Atom 2 | Counts | Bond length (Å) |
|--------|--------|--------|-----------------|
| Ca     | O1     | 2      | 2.294           |
|        | O2     | 2      | 2.397           |
|        | O3     | 2      | 2.274           |
| Lu     | O1     | 1      | 2.325           |
|        | O2     | 2      | 2.265           |
|        | O2     | 2      | 2.403           |
|        | O3     | 1      | 2.303           |
| Ga     | O1     | 1      | 1.770           |
|        | O2     | 2      | 1.833           |
|        | O3     | 1      | 1.756           |

Table S2 Specific parameter values necessary for the calculation of  $he$  and  $E_{sp}$

| Parameter              | Ca site | Parameter              | Lu site |
|------------------------|---------|------------------------|---------|
| BVP(Ca)                | 1.967   | BVP(Lu)                | 1.971   |
| Q(Ca)                  | 2.324   | Q(Lu)                  | 2.319   |
| Q(O1)                  | 1.550   | Q(O1)                  | 1.546   |
| Q(O2)                  | 1.550   | Q(O2)                  | 1.546   |
| Q(O3)                  | 1.550   | Q(O3)                  | 1.546   |
| $f_c(\text{Ca-O1})$    | 0.195   | $f_c(\text{Lu-O1})$    | 0.199   |
| $f_c(\text{Ca-O2})$    | 0.192   | $f_c(\text{Lu-O2})$    | 0.198   |
| $f_c(\text{Ca-O3})$    | 0.196   | $f_c(\text{Lu-O3})$    | 0.199   |
| $\alpha(\text{Ca-O1})$ | 0.712   | $\alpha(\text{Lu-O1})$ | 0.863   |
| $\alpha(\text{Ca-O2})$ | 0.844   | $\alpha(\text{Lu-O2})$ | 0.875   |
| $\alpha(\text{Ca-O3})$ | 0.689   | $\alpha(\text{Lu-O3})$ | 0.833   |
